# Supplementary material for: The association between peripheral neuropathy and daily-life gait quality characteristics in people with diabetes
Source: bioRxiv or medRxiv preprint supplement (doi:10.1101/2024.02.21.24303128), 2024-02-22
Supplement: Supplementary file [file media-1.pdf]

## Appendix A

Table A1 – Socio-demographic, clinical and daily-life activity characteristics of DIALOAD participants aged ≥55 and <55 years

| Socio-demographic and clinical characteristics  | DIALOAD ≥55 years (n=50)             | DIALOAD <55 years (n=8)               | p-value   |
|-------------------------------------------------|--------------------------------------|---------------------------------------|-----------|
| Age (years)                                     | 67.7 (SD 7.3)                        | 49.8 (SD 3.7)                         | <0.001*** |
| Female sex                                      | 20 (10)                              | 13 (1)                                | 0.615     |
| Height (cm)                                     | 182.3 (SD 10.5)                      | 182.4 (SD 5.0)                        | 0.993     |
| BMI (kg/m <sup>2</sup> )                        | 29.6 (SD 5.4)                        | 30.2 (SD 6.3)                         | 0.809     |
| Type 2 diabetes                                 | 88 (44)                              | 38 (3)                                | <0.001*** |
| Presence of peripheral neuropathy               | 100 (50)                             | 100 (8)                               | 1.000     |
| Employed                                        | 34 (17)                              | 100 (8)                               | <0.001*** |
| Living alone                                    | 48 (24)                              | 25 (2)                                | 0.225     |
| Education level                                 |                                      |                                       | 0.209     |
| - Low                                           | 26 (13)                              | 25 (2)                                |           |
| - Moderate                                      | 22 (11)                              | 50 (4)                                |           |
| - High                                          | 52 (26)                              | 25 (2)                                |           |
| Short Physical Performance Battery score (0-12) | 9.0 [IQ 7.0; 10.0] <sup>(n=38)</sup> | 12.0 [IQ 11.0; 12.0] <sup>(n=6)</sup> | <0.001*** |
| <b>Daily-life activity characteristics</b>      | <b>(n=47)</b>                        | <b>(n=8)</b>                          |           |
| Walking                                         |                                      |                                       |           |
| - Number of steps per day                       | 5213 (SD 3404)                       | 9292 (SD 3165)                        | 0.003**   |
| - Number of episodes per day                    | 349 (SD 182)                         | 560 (SD 561)                          | 0.006**   |
| - Duration per day (hours)                      | 1.1 (SD 0.6)                         | 1.8 (SD 0.6)                          | 0.002**   |
| Standing                                        |                                      |                                       |           |
| - Number of episodes per day                    | 744 (SD 345)                         | 1201 (SD 501)                         | 0.002**   |
| - Duration per day (hours)                      | 1.8 (SD 0.7)                         | 2.9 (SD 0.8)                          | <0.001*** |
| Sitting                                         |                                      |                                       |           |
| - Number of episodes per day                    | 91 (SD 25)                           | 135 (SD 73)                           | 0.127     |
| - Duration per day (hours)                      | 9.4 (SD 2.7)                         | 7.3 (SD 1.5)                          | 0.037*    |
| Lying                                           |                                      |                                       |           |
| - Number of episodes per day                    | 11 (SD 5)                            | 12 (SD 7)                             | 0.679     |
| - Duration per day (hours)                      | 9.7 (SD 2.8)                         | 8.8 (SD 3.4)                          | 0.384     |
| Total wearing time per day (hours)              | 22.3 (SD 2.4)                        | 21.4 (SD 3.5)                         | 0.295     |

Note: Continuous data are mean (SD standard deviation) if normally distributed and median [IQ 25th percentile; 75<sup>th</sup> percentile] if not normally distributed, and discrete data are percentage (number of). Significant differences are depicted as \*\*\* =  $p < 0.001$ , \*\* =  $p < 0.01$  and \* =  $p < 0.05$ . If data was missing for a characteristic, the number of available data is shown in superscript.
